# Supplementary material for: Loss of Mitochondrial Genetic Diversity despite Population Growth: The Legacy of Past Wolf Population Declines
Source: MDPI journal article supplement (doi:10.3390/genes14010075), 2022-12-26

## Supplementary material

### Loss of mitochondrial genetic diversity despite population growth: the legacy of past wolf population declines

Isabel Salado<sup>1</sup>, Michaela Preick<sup>2</sup>, Natividad Lupiáñez-Corpas<sup>1</sup>, Alberto Fernández-Gil<sup>1</sup>, Carles Vilà<sup>1</sup>,  
Michael Hofreiter<sup>2</sup>, Jennifer A. Leonard<sup>1</sup>

**Figure S1. Distribution of MT haplotypes in historical Iberian wolves.** Private to historical wolves (filled circles), shared with modern wolves (empty circles) and unique haplotype in Sierra Morena (red circles). Current wolf distribution is shaded in blue, following [34,35]. Dotted line marks the Douro river, which has limited distinct management strategies.

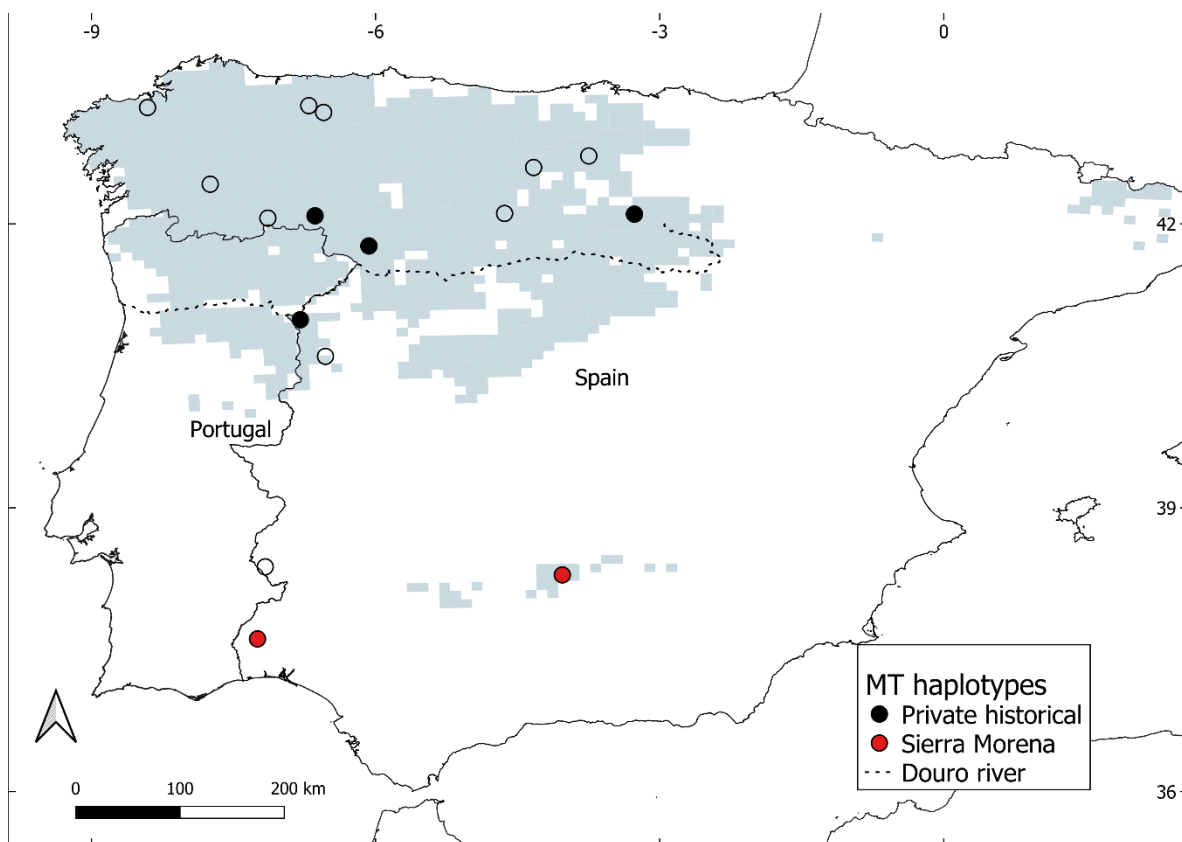

Supplement: s1 [file s1]
