# Supplementary material for: Loss of Mitochondrial Genetic Diversity despite Population Growth: The Legacy of Past Wolf Population Declines
Source: Genes (Basel). 2022 Dec 26;14(1):75. doi: 10.3390/genes14010075 (PMC9858670; doi:10.3390/genes14010075)
Supplement: Supplementary file 1 [file genes-14-00075-s001.zip › genes-2075215-supplementary/TableS1_proof.xlsx]

## Sheet: Hoja1
Table S1. Sampled historical Iberian wolves not included in downstream analyses. Due to an unsuccessful genomic library or insufficient endogenous DNA.
Sample ID, specimen information (scientific collection Catalog number, year, locality); Coverage of NGS, calculated as total mapped sequence length divided by reference mitogenome size (16,727 bp).
Sample	Collection #	Year	Country	Locality	Coverage	Notes
JAL7530	EBD 7841M	1972	Spain	Andalucía, Huelva, Santa Barbara de Casa	-
JAL7531	EBD 7861M	1972	Spain	Extremadura, Badajoz, Villanueva del Fresno	-	Same individual as JAL7556 (Table 1)
JAL7532	EBD 7874M	c1970	Spain	Andalucía, Huelva, Puebla de Guzmán	<0.1
JAL7534	EBD 15856M	1974	Spain	Castilla La-Mancha, Toledo, Talavera de la Reina	-
JAL7535	EBD 15023M	1971	Spain	Andalucía, Jaén, Andújar, Fuentes de Villar	-
JAL7536	EBD 7830M	1971	Spain	Castilla y León, León, Castrocontrigo	-
JAL7537	EBD 7831M	1964	Spain	Andalucía, Jaén, Andújar, El Villar	-
JAL7538	EBD 27847M	1974	Spain	Galicia, La Coruña, Cerceda	-
JAL7539	EBD 15888M	1972	Spain	Galicia, Lugo, Becerrea	-
JAL7540	EBD 7851M	c1970	Spain	Castilla y León, Zamora, Ferreruela,El Flogoso, Sanabria	-
JAL7541	EBD 15025M	1974	Spain	Galicia, Orense, Baños de Molgas	-
JAL7542	EBD 15020M	1975	Spain	Andalucía, Jaén, Andújar	-
JAL7543					-	Same individual as JAL7542
JAL7544	EBD 15021M	1974	Spain	Andalucía, Jaén, Andújar	-
JAL7551	EBD 15854M	1974	Spain	Andalucía, Huelva, Higuera de la Sierra	-
JAL7552	EBD 14866M	1976	Spain	Castilla La-Mancha, Ciudad Real, La Torrecilla, Solana del Pino	-
JAL7553	EBD 3356M	1979	Spain	Andalucía, Huelva, Aracena	-
JAL7554	EBD 15140M	1975	Spain	Andalucía, Huelva, Finca Caravales	-
JAL7557	EBD 4176M	c1970	Spain	Extremadura, Badajoz, Sierra de San Pedro	0.1
JAL7558	EBD 15137M	1975	Spain	Extremadura, Badajoz, Zafra	0.1
JAL7560	EBD 18004M	1977	Spain	Andalucía, Jaén, Sierra Andújar
JAL7561	EBD 6119M	1977	Spain	Andalucía, Jaén, Andújar, Finca La Sandina	0.5
JAL7564	EBD 15132M	1972	Spain	Asturias, Monasterio de Hermo, Cangas de Narcea	<0.1
JAL7565	EBD 15038M	c1970	Spain	Galicia, Orense, Sarreaus	-
JAL7566	EBD 14875M	1978	Spain	Andalucía, Huelva, Aracena	0.3
JAL7568	EBD 14861M	1974	Spain	Galicia, Orense, Sarreaus, Mte. San Pedro Perrelas	<0.1
JAL7569	EBD 15036M	1960	Spain	Castilla y León, Ávila, Sierra de Gredos	0.4
JAL7570	EBD 4437M	1983	Portugal	Beiras y Serra da Estrela, Guarda, Pinhel	-
JAL7571	EBD 7827M	1979	Portugal	Beiras y Serra da Estrela, close to Navasfrias, la Siosa de Raia. Sabogal.	0.7
JAL7572	EBD 2857M	1981	Portugal	Figueira de Castelo Rodrigo	0.3
JAL7575	EBD 7842M	1970	Spain	Asturias, Tineo	0.4
JAL7577	EBD 7825M	c1970	Spain	Castilla y León, Salamanca, Ciudad Rodrigo	0.1
JAL7579	EBD 14882M	1976	Spain	Galicia, Orense, Cualedro	0.1
JAL7580	EBD 15031M	1975	Spain	Castilla y León, Zamora, Tábara	-
JAL7582	EBD 7872M	c1970	Spain	Galicia, Lugo, Guitiriz	<0.1
JAL7584	EBD 7868M	c1970	Spain	Galicia, Orense, San Ciprian de Viñas	0.1
JAL7588	EBD 7844M	1970	Spain	Andalucía, Huelva, El Mustio, Aroche	0.1
JAL7589	EBD 30410M	c1950	Spain	Andalucía, Córdoba,Santa María de Trassierra	-
JAL7590	EBD 3924M	1974	Spain	Castilla y León, Burgos, Vizcainos	<0.1
JAL7591	-	c1886	Spain	Andalucía, Granada, Sierra Nevada	<0.1
JAL7592					-	Same individual as JAL7591
